# Supplementary material
Source: publisher figshare collection journal article supplement (https://tandf.figshare.com/articles/dataset/_/13245230)
Supplement: Supplementary file 1 [file 1]

| Chronic Lung Disease  Broncho-Pulmonary Dysplasia  Cystic Fibrosis  Pulmonary Hypertension  Interstitial Lung Disease  Primary Immunodeficiency  Bronchiectasis  Primary Ciliary Dyskinesia  Chronic Respiratory Insufficiency  Neuromuscular Weakness  Sickle Cell Lung Disease  Restrictive Lung Disease  Tracheostomy or Ventilator-dependence |
| --- |

Appendix Table 1. Co-Morbid Conditions Used in Exclusion Criteria of Trial

Appendix Figure 1. Sensor

Appendix Figure 2. Webportal
